# Supplementary material for: Unbalanced translocations arise from diverse mutational mechanisms including chromothripsis
Source: HighWire-hosted journal article supplement (doi:10.1101/gr.191247.115), 2015-06-12
Supplement: Supplemental_Material.docx [file Supplemental_Material.docx]

**Supplemental Material**

**Supplemental Table S1.** Breakpoints of 51 simple translocations. We list the karyotype and chromosomal microarray analysis (CMA) from initial clinical studies, the methods used to capture each junction, and breakpoint locations estimated by custom array CGH. Methods that were not performed or successful are annotated as not applicable (N/A). Breakpoints sequenced by NGS and/or Sanger sequencing are listed for the chromosome loss (chrA) and gain (chrB). Junction features, such as microhomology, blunt ends, and insertions, are included for 37 translocations with Sanger-confirmed breakpoints. Breakpoints in repetitive regions and/or in genes are indicated. For all translocations, we analyzed the orientation and reading frame of genes at breakpoints and predicted fusion transcripts.

**Supplemental Table S2**. Breakpoints of complex and chromothripsis translocations. Each breakpoint junction is described in a separate row. Data provided are the same as in Supplemental Table S1.

**Supplemental Table S3.** Translocation parent of origin of EGL302 and EGL321. In these rearrangements, SNPs within one kb of chromosome breakpoints are all derived from paternal alleles. SNPs lie in copy-neutral regions adjacent to breakpoints, so there are two alleles in the parents and the proband.

**Supplemental Table S4.** Breakpoint junction sequences. Breakpoints from complex rearrangements are named with Junction IDs listed in Supplemental Table S2.

**Supplemental Figure S1.** FISH analysis of EGL302’s chromosome rearrangements. (*A*) 8q23.3 region translocated to the long arm of Chromosome 3. (*B*) 9pter translocated to the long arm of Chromosome 8. (*C*) 9p24.1 region remains on the derivative Chromosome 9. (*D*) 8q24.3 region is absent from the derivative Chromosome 8. (*E*) 3q25.33 region is absent from the derivative Chromosome 3. (*F*) BAC probes.In all panels, the green probe hybridizes to a region that is not involved in the rearrangement and serves as a control to identify the chromosome. The red signal corresponds to the region tested.

**Supplemental Figure S2**. FISH analysis of EGL321’s chromosome rearrangements. (*A*) 2q24.3 region translocated is not present on the derivative Chromosome 2. (*B*) 2q32.1 region translocated to the long arm of derivative Chromosome 10. (*C*) 2q32.3 is absent from the derivative Chromosome 2. (*D*) Region within 2q32 is absent from the derivative Chromosome 2. (*E*) 7q21.1 region is absent from the derivative Chromosome 7. (*F*) 7q21.12 region is present on the derivative Chromosome 7. (*G*) 7q21.2 region is absent from the derivative Chromosome 7. (*H*) Region of 7q36.3 translocated to the long arm of the derivative Chromosome 2. (*I*) The end of Chromosome 2 (2q37.3) translocated to the long arm of derivative Chromosome 7. (*J*) BAC probes.The green probe hybridizes to the control chromosome, and the red signal corresponds to the region tested.
