# Supplementary material for: Unbalanced translocations arise from diverse mutational mechanisms including chromothripsis
Source: HighWire-hosted journal article supplement (doi:10.1101/gr.191247.115), 2015-06-12
Supplement: TableS2.xlsx [file TableS2.xlsx]

## Sheet: S2
Subject	Sex	Inheritance	Translocation Karyotype	Chromosomal Microarray Analysis (hg19)	Custom Agilent array AMADID	aCGH CNV (hg19)	SureSelect ELID	SureSelect Discordant reads	WGS ID	WGS Discordant Reads	Junction Features	Junction ID	Derivative Chromosome	ChrA	ChrA Strand	Repeating Elements	Gene	Gene Direction	ChrB	ChrB Strand	Repeating Elements	Gene	Gene Direction
EGL302	M	de novo	t(3;8;9)(3pter->3q26.1::8q22.3->8q23.1::3q26.1->3qter;8pter->8q23.1::9p23->9pter;8qter->8q23.1::3q26.1::9p24.1::8q23.1::9p24.1->9qter)t(11;13)(13qter->13q21.1::11p14.1->11qter;13pter->13q21.1::11p14.1->11pter)	arr 8q22.3q23.1(106065758-108815763)x1,9p23p22.2(11086096-17636669)x1	253570910002_1	chr8(106040617-108853244)x1 chr9(11077354-17655834)x1	404011	N	GS000021388	Y	Blunt Ends	der(3) junction 1	chr3	chr3:157587119	+	MLT1J-int			chr3:166064711	+	L1M1
EGL302	M	de novo	t(3;8;9)(3pter->3q26.1::8q22.3->8q23.1::3q26.1->3qter;8pter->8q23.1::9p23->9pter;8qter->8q23.1::3q26.1::9p24.1::8q23.1::9p24.1->9qter)t(11;13)(13qter->13q21.1::11p14.1->11qter;13pter->13q21.1::11p14.1->11pter)	arr 8q22.3q23.1(106065758-108815763)x1,9p23p22.2(11086096-17636669)x1	253570910002_1	chr8(106040617-108853244)x1 chr9(11077354-17655834)x1	404011	N	GS000021388	Y	Microhomology CAA	der(3) junction 2	chr3	chr3:167193653	+				chr8:112380966	+
EGL302	M	de novo	t(3;8;9)(3pter->3q26.1::8q22.3->8q23.1::3q26.1->3qter;8pter->8q23.1::9p23->9pter;8qter->8q23.1::3q26.1::9p24.1::8q23.1::9p24.1->9qter)t(11;13)(13qter->13q21.1::11p14.1->11qter;13pter->13q21.1::11p14.1->11pter)	arr 8q22.3q23.1(106065758-108815763)x1,9p23p22.2(11086096-17636669)x1	253570910002_1	chr8(106040617-108853244)x1 chr9(11077354-17655834)x1	404011	N	GS000021388	Y	Blunt Ends	der(3) junction 3	chr3	chr8:115369628	+	L1M1			chr3:167193723	+
EGL302	M	de novo	t(3;8;9)(3pter->3q26.1::8q22.3->8q23.1::3q26.1->3qter;8pter->8q23.1::9p23->9pter;8qter->8q23.1::3q26.1::9p24.1::8q23.1::9p24.1->9qter)t(11;13)(13qter->13q21.1::11p14.1->11qter;13pter->13q21.1::11p14.1->11pter)	arr 8q22.3q23.1(106065758-108815763)x1,9p23p22.2(11086096-17636669)x1	253570910002_1	chr8(106040617-108853244)x1 chr9(11077354-17655834)x1	404011	N	GS000021388	Y	Microhomology G	der(11)t(11;13) translocation junction	chr11	chr13:57152860	-	AluSx1			chr11:27875368	+
EGL302	M	de novo	t(3;8;9)(3pter->3q26.1::8q22.3->8q23.1::3q26.1->3qter;8pter->8q23.1::9p23->9pter;8qter->8q23.1::3q26.1::9p24.1::8q23.1::9p24.1->9qter)t(11;13)(13qter->13q21.1::11p14.1->11qter;13pter->13q21.1::11p14.1->11pter)	arr 8q22.3q23.1(106065758-108815763)x1,9p23p22.2(11086096-17636669)x1	253570910002_1	chr8(106040617-108853244)x1 chr9(11077354-17655834)x1	404011	N	GS000021388	Y	Microhomology AG	der(13)t(11;13) translocation junction	chr13	chr13:57152863	+	AluSx1			chr11:27875367	-
EGL302	M	de novo	t(3;8;9)(3pter->3q26.1::8q22.3->8q23.1::3q26.1->3qter;8pter->8q23.1::9p23->9pter;8qter->8q23.1::3q26.1::9p24.1::8q23.1::9p24.1->9qter)t(11;13)(13qter->13q21.1::11p14.1->11qter;13pter->13q21.1::11p14.1->11pter)	arr 8q22.3q23.1(106065758-108815763)x1,9p23p22.2(11086096-17636669)x1	253570910002_1	chr8(106040617-108853244)x1 chr9(11077354-17655834)x1	404011	N	GS000021388	N	Inferred	der(8) junction 1	chr8	8q	+				9pter	-
EGL302	M	de novo	t(3;8;9)(3pter->3q26.1::8q22.3->8q23.1::3q26.1->3qter;8pter->8q23.1::9p23->9pter;8qter->8q23.1::3q26.1::9p24.1::8q23.1::9p24.1->9qter)t(11;13)(13qter->13q21.1::11p14.1->11qter;13pter->13q21.1::11p14.1->11pter)	arr 8q22.3q23.1(106065758-108815763)x1,9p23p22.2(11086096-17636669)x1	253570910002_1	chr8(106040617-108853244)x1 chr9(11077354-17655834)x1	404011	N	GS000021388	Y	Blunt Ends	der(9) junction 1	chr9	chr8:115709278	-	L1MD3			chr8:112380944	-
EGL302	M	de novo	t(3;8;9)(3pter->3q26.1::8q22.3->8q23.1::3q26.1->3qter;8pter->8q23.1::9p23->9pter;8qter->8q23.1::3q26.1::9p24.1::8q23.1::9p24.1->9qter)t(11;13)(13qter->13q21.1::11p14.1->11qter;13pter->13q21.1::11p14.1->11pter)	arr 8q22.3q23.1(106065758-108815763)x1,9p23p22.2(11086096-17636669)x1	253570910002_1	chr8(106040617-108853244)x1 chr9(11077354-17655834)x1	404011	N	GS000021388	Y	Blunt Ends	der(9) junction 2	chr9	chr8:108852174	-				chr3:166064710	-	L1M1
EGL302	M	de novo	t(3;8;9)(3pter->3q26.1::8q22.3->8q23.1::3q26.1->3qter;8pter->8q23.1::9p23->9pter;8qter->8q23.1::3q26.1::9p24.1::8q23.1::9p24.1->9qter)t(11;13)(13qter->13q21.1::11p14.1->11qter;13pter->13q21.1::11p14.1->11pter)	arr 8q22.3q23.1(106065758-108815763)x1,9p23p22.2(11086096-17636669)x1	253570910002_1	chr8(106040617-108853244)x1 chr9(11077354-17655834)x1	404011	N	GS000021388	Y	Blunt Ends	der(9) junction 3	chr9	chr3:157587119	-	MLT1J-int			chr9:8719701	-	MER58A	PTPRD	-
EGL302	M	de novo	t(3;8;9)(3pter->3q26.1::8q22.3->8q23.1::3q26.1->3qter;8pter->8q23.1::9p23->9pter;8qter->8q23.1::3q26.1::9p24.1::8q23.1::9p24.1->9qter)t(11;13)(13qter->13q21.1::11p14.1->11qter;13pter->13q21.1::11p14.1->11pter)	arr 8q22.3q23.1(106065758-108815763)x1,9p23p22.2(11086096-17636669)x1	253570910002_1	chr8(106040617-108853244)x1 chr9(11077354-17655834)x1	404011	N	GS000021388	Y	Blunt Ends	der(9) junction 4	chr9	chr9:8384166	-				chr8:106040228	-
EGL302	M	de novo	t(3;8;9)(3pter->3q26.1::8q22.3->8q23.1::3q26.1->3qter;8pter->8q23.1::9p23->9pter;8qter->8q23.1::3q26.1::9p24.1::8q23.1::9p24.1->9qter)t(11;13)(13qter->13q21.1::11p14.1->11qter;13pter->13q21.1::11p14.1->11pter)	arr 8q22.3q23.1(106065758-108815763)x1,9p23p22.2(11086096-17636669)x1	253570910002_1	chr8(106040617-108853244)x1 chr9(11077354-17655834)x1	404011	N	GS000021388	N	Inferred	der(9) junction 5	chr9	8q					9p
EGL302	M	de novo	t(3;8;9)(3pter->3q26.1::8q22.3->8q23.1::3q26.1->3qter;8pter->8q23.1::9p23->9pter;8qter->8q23.1::3q26.1::9p24.1::8q23.1::9p24.1->9qter)t(11;13)(13qter->13q21.1::11p14.1->11qter;13pter->13q21.1::11p14.1->11pter)	arr 8q22.3q23.1(106065758-108815763)x1,9p23p22.2(11086096-17636669)x1	253570910002_1	chr8(106040617-108853244)x1 chr9(11077354-17655834)x1	404011	N	GS000021388	Y	Microhomology A	der(9) junction 6	chr9	chr9:8384164	-		PTPRD	-	chr9:8430296	+	AluJb	PTPRD	-
EGL302	M	de novo	t(3;8;9)(3pter->3q26.1::8q22.3->8q23.1::3q26.1->3qter;8pter->8q23.1::9p23->9pter;8qter->8q23.1::3q26.1::9p24.1::8q23.1::9p24.1->9qter)t(11;13)(13qter->13q21.1::11p14.1->11qter;13pter->13q21.1::11p14.1->11pter)	arr 8q22.3q23.1(106065758-108815763)x1,9p23p22.2(11086096-17636669)x1	253570910002_1	chr8(106040617-108853244)x1 chr9(11077354-17655834)x1	404011	N	GS000021388	Y	Microhomology C	chr9 deletion	chr9	chr9:11079152	+				chr9:17655918	+		SH3GL2	+
EGL305	M	maternal	t(1;4;7;15)(1pter->1q21::15q22->15qter;4pter->4q31::1q21->1qter;15pter->15q22::7p14.3->7p15.1::4q31->4qter)	arr 1q21.2(150006344-150386691)x1,7p14.2p15.1(30460549-34600277)x3	253573010002_2	chr1(149990876-150460574)x1 chr7(30371967-34614553)x1	404011	Y	N/A	N/A	Microhomology TG	der(1) junction 1	chr1	chr1:149990952					chr15:29112987	-	AluY
EGL305	M	maternal	t(1;4;7;15)(1pter->1q21::15q22->15qter;4pter->4q31::1q21->1qter;15pter->15q22::7p14.3->7p15.1::4q31->4qter)	arr 1q21.2(150006344-150386691)x1,7p14.2p15.1(30460549-34600277)x3	253573010002_2	chr1(149990876-150460574)x1 chr7(30371967-34614553)x1	404011	N	N/A	N/A	Inferred	der(1) junction 2	chr1	15q					15q
EGL305	M	maternal	t(1;4;7;15)(1pter->1q21::15q22->15qter;4pter->4q31::1q21->1qter;15pter->15q22::7p14.3->7p15.1::4q31->4qter)	arr 1q21.2(150006344-150386691)x1,7p14.2p15.1(30460549-34600277)x3	253573010002_2	chr1(149990876-150460574)x1 chr7(30371967-34614553)x1	404011	N	N/A	N/A	Inferred	der(4) junction 1	chr4	4q31					chr1:150520739	+
EGL305	M	maternal	t(1;4;7;15)(1pter->1q21::15q22->15qter;4pter->4q31::1q21->1qter;15pter->15q22::7p14.3->7p15.1::4q31->4qter)	arr 1q21.2(150006344-150386691)x1,7p14.2p15.1(30460549-34600277)x3	253573010002_2	chr1(149990876-150460574)x1 chr7(30371967-34614553)x1	404011	N	N/A	N/A	Inferred	der(15) junction 1	chr15	15q22					chr7:34614607	-
EGL305	M	maternal	t(1;4;7;15)(1pter->1q21::15q22->15qter;4pter->4q31::1q21->1qter;15pter->15q22::7p14.3->7p15.1::4q31->4qter)	arr 1q21.2(150006344-150386691)x1,7p14.2p15.1(30460549-34600277)x3	253573010002_2	chr1(149990876-150460574)x1 chr7(30371967-34614553)x1	404011	Y	N/A	N/A	NGS	der(15) junction 2	chr15	chr7:30372066					chr4:149488444	+
EGL312	M	unknown	der(13)t(9;9;13)(p24.3p21.1;p13.3p13.1;pter)	arr 9p24.3p21.1(220257-29424846)x3,9p13.3p13.1(35623497-38815471)x3	253570910002_2	chr9(1-29453926)x3 chr9(35878015-40082468)x3	404011	N	Nextera_312	Y	NGS	der(13) junction 1	chr13	chr9:29453926	+	L1PA3			chr9:40082468	-	segmental duplication
EGL312	M	unknown	der(13)t(9;9;13)(p24.3p21.1;p13.3p13.1;pter)	arr 9p24.3p21.1(220257-29424846)x3,9p13.3p13.1(35623497-38815471)x3	253570910002_2	chr9(1-29453926)x3 chr9(35878015-40082468)x3	404011	N	Nextera_312	N	inferred	der(13) junction 2	chr13	chr9:35878015	-	L1MEc			13p	+
EGL321	F	de novo	der(2)(2pter->2q24.2::7q21.11->7qter),t(3;11)(q21;q14.1),der(7)(7pter->7q21.11::2q33.1->2qter), ins(10;2;7)(q21.3;q32.2q32.3;q21.11q22.1)	arr 7q21.11(81661185-82460701)x1,11q14.1(79992695-82232051)x1	253573010003_1	chr7(81641240-82492482)x1 chr11(79874785-82308061)x1	404011	N	GS000021336	Y	Blunt Ends	der(2) junction 1	chr2	chr2:190374150	+	THE1B-int			chr7:82941522	+
EGL321	F	de novo	der(2)(2pter->2q24.2::7q21.11->7qter),t(3;11)(q21;q14.1),der(7)(7pter->7q21.11::2q33.1->2qter), ins(10;2;7)(q21.3;q32.2q32.3;q21.11q22.1)	arr 7q21.11(81661185-82460701)x1,11q14.1(79992695-82232051)x1	253573010003_1	chr7(81641240-82492482)x1 chr11(79874785-82308061)x1	404011	N	GS000021336	Y	Microhomology G	der(2) junction 2	chr2	chr7:86379961	+		GRM3	+	chr7:86381361	-	L1ME3A	GRM3	+
EGL321	F	de novo	der(2)(2pter->2q24.2::7q21.11->7qter),t(3;11)(q21;q14.1),der(7)(7pter->7q21.11::2q33.1->2qter), ins(10;2;7)(q21.3;q32.2q32.3;q21.11q22.1)	arr 7q21.11(81661185-82460701)x1,11q14.1(79992695-82232051)x1	253573010003_1	chr7(81641240-82492482)x1 chr11(79874785-82308061)x1	404011	N	GS000021336	Y	Blunt Ends	der(2) junction 3	chr2	chr7:86379961	-		GRM3	+	chr2:199512158	-
EGL321	F	de novo	der(2)(2pter->2q24.2::7q21.11->7qter),t(3;11)(q21;q14.1),der(7)(7pter->7q21.11::2q33.1->2qter), ins(10;2;7)(q21.3;q32.2q32.3;q21.11q22.1)	arr 7q21.11(81661185-82460701)x1,11q14.1(79992695-82232051)x1	253573010003_1	chr7(81641240-82492482)x1 chr11(79874785-82308061)x1	404011	N	GS000021336	N	Inferred	der(2) junction 4	chr2	2q33.1					7qter
EGL321	F	de novo	der(2)(2pter->2q24.2::7q21.11->7qter),t(3;11)(q21;q14.1),der(7)(7pter->7q21.11::2q33.1->2qter), ins(10;2;7)(q21.3;q32.2q32.3;q21.11q22.1)	arr 7q21.11(81661185-82460701)x1,11q14.1(79992695-82232051)x1	253573010003_1	chr7(81641240-82492482)x1 chr11(79874785-82308061)x1	404011	N	GS000021336	Y	Microhomology CAAG	der(3) t(11;13)	chr3	chr3:122192645	+	L1MC1	KPNA1	-	chr11:84506894	-	MER52A	DLG2	-
EGL321	F	de novo	der(2)(2pter->2q24.2::7q21.11->7qter),t(3;11)(q21;q14.1),der(7)(7pter->7q21.11::2q33.1->2qter), ins(10;2;7)(q21.3;q32.2q32.3;q21.11q22.1)	arr 7q21.11(81661185-82460701)x1,11q14.1(79992695-82232051)x1	253573010003_1	chr7(81641240-82492482)x1 chr11(79874785-82308061)x1	404011	Y	GS000021336	Y	Microhomology CAG	der(3) chr11 inversion	chr3	chr11:82309073	-				chr11:84506903	+	MER52A	DLG2	-
EGL321	F	de novo	der(2)(2pter->2q24.2::7q21.11->7qter),t(3;11)(q21;q14.1),der(7)(7pter->7q21.11::2q33.1->2qter), ins(10;2;7)(q21.3;q32.2q32.3;q21.11q22.1)	arr 7q21.11(81661185-82460701)x1,11q14.1(79992695-82232051)x1	253573010003_1	chr7(81641240-82492482)x1 chr11(79874785-82308061)x1	404011	N	GS000021336	Y	Microhomology A	der(7) junction 1	chr7	chr7:81641277	+		CACNA2D1	-	chr7:87543382	-	ERV3-16A3_I-int
EGL321	F	de novo	der(2)(2pter->2q24.2::7q21.11->7qter),t(3;11)(q21;q14.1),der(7)(7pter->7q21.11::2q33.1->2qter), ins(10;2;7)(q21.3;q32.2q32.3;q21.11q22.1)	arr 7q21.11(81661185-82460701)x1,11q14.1(79992695-82232051)x1	253573010003_1	chr7(81641240-82492482)x1 chr11(79874785-82308061)x1	404011	N	GS000021336	Y	Microhomology A	der(7) junction 2	chr7	chr7:86718745	-	L1PB4			chr2:199512155	+
EGL321	F	de novo	der(2)(2pter->2q24.2::7q21.11->7qter),t(3;11)(q21;q14.1),der(7)(7pter->7q21.11::2q33.1->2qter), ins(10;2;7)(q21.3;q32.2q32.3;q21.11q22.1)	arr 7q21.11(81661185-82460701)x1,11q14.1(79992695-82232051)x1	253573010003_1	chr7(81641240-82492482)x1 chr11(79874785-82308061)x1	404011	N	GS000021336	N	Inferred	der(7) junction 3	chr7	2q36.1					2q36.1
EGL321	F	de novo	der(2)(2pter->2q24.2::7q21.11->7qter),t(3;11)(q21;q14.1),der(7)(7pter->7q21.11::2q33.1->2qter), ins(10;2;7)(q21.3;q32.2q32.3;q21.11q22.1)	arr 7q21.11(81661185-82460701)x1,11q14.1(79992695-82232051)x1	253573010003_1	chr7(81641240-82492482)x1 chr11(79874785-82308061)x1	404011	N	GS000021336	Y	Microhomology T	der(7) junction 4	chr7	chr2:189327286	-	L1MA2	GULP1	+	chr7:86718743	-	L1PB4
EGL321	F	de novo	der(2)(2pter->2q24.2::7q21.11->7qter),t(3;11)(q21;q14.1),der(7)(7pter->7q21.11::2q33.1->2qter), ins(10;2;7)(q21.3;q32.2q32.3;q21.11q22.1)	arr 7q21.11(81661185-82460701)x1,11q14.1(79992695-82232051)x1	253573010003_1	chr7(81641240-82492482)x1 chr11(79874785-82308061)x1	404011	N	GS000021336	Y	Blunt Ends	der(7) junction 5	chr7	chr7:86381352	-	L1ME3A	GRM3	+	chr2:193769345	+	L1PA16
EGL321	F	de novo	der(2)(2pter->2q24.2::7q21.11->7qter),t(3;11)(q21;q14.1),der(7)(7pter->7q21.11::2q33.1->2qter), ins(10;2;7)(q21.3;q32.2q32.3;q21.11q22.1)	arr 7q21.11(81661185-82460701)x1,11q14.1(79992695-82232051)x1	253573010003_1	chr7(81641240-82492482)x1 chr11(79874785-82308061)x1	404011	N	GS000021336	N	Inferred	der(7) junction 6	chr7	2q32.3					7q21.11
EGL321	F	de novo	der(2)(2pter->2q24.2::7q21.11->7qter),t(3;11)(q21;q14.1),der(7)(7pter->7q21.11::2q33.1->2qter), ins(10;2;7)(q21.3;q32.2q32.3;q21.11q22.1)	arr 7q21.11(81661185-82460701)x1,11q14.1(79992695-82232051)x1	253573010003_1	chr7(81641240-82492482)x1 chr11(79874785-82308061)x1	404011	N	GS000021336	Y	Blunt Ends	der(7) junction 7	chr7	chr7:82930824	+				chr2:190374148	+	THE1B-int
EGL321	F	de novo	der(2)(2pter->2q24.2::7q21.11->7qter),t(3;11)(q21;q14.1),der(7)(7pter->7q21.11::2q33.1->2qter), ins(10;2;7)(q21.3;q32.2q32.3;q21.11q22.1)	arr 7q21.11(81661185-82460701)x1,11q14.1(79992695-82232051)x1	253573010003_1	chr7(81641240-82492482)x1 chr11(79874785-82308061)x1	404011	N	GS000021336	Y	Insertion ATACA	der(10) junction 1	chr10	chr10:66617705	+	L1MC5			chr2:189911145	-	Charlie2A	COL5A2	-
EGL321	F	de novo	der(2)(2pter->2q24.2::7q21.11->7qter),t(3;11)(q21;q14.1),der(7)(7pter->7q21.11::2q33.1->2qter), ins(10;2;7)(q21.3;q32.2q32.3;q21.11q22.1)	arr 7q21.11(81661185-82460701)x1,11q14.1(79992695-82232051)x1	253573010003_1	chr7(81641240-82492482)x1 chr11(79874785-82308061)x1	404011	N	GS000021336	Y	Microhomology A	der(10) junction 2	chr10	chr2:188910481	-	MLT1A1-int			chr2:193517845	+	L1MD
EGL321	F	de novo	der(2)(2pter->2q24.2::7q21.11->7qter),t(3;11)(q21;q14.1),der(7)(7pter->7q21.11::2q33.1->2qter), ins(10;2;7)(q21.3;q32.2q32.3;q21.11q22.1)	arr 7q21.11(81661185-82460701)x1,11q14.1(79992695-82232051)x1	253573010003_1	chr7(81641240-82492482)x1 chr11(79874785-82308061)x1	404011	N	GS000021336	N	Inferred	der(10) junction 3	chr10	2q32.3					2q24.2
EGL321	F	de novo	der(2)(2pter->2q24.2::7q21.11->7qter),t(3;11)(q21;q14.1),der(7)(7pter->7q21.11::2q33.1->2qter), ins(10;2;7)(q21.3;q32.2q32.3;q21.11q22.1)	arr 7q21.11(81661185-82460701)x1,11q14.1(79992695-82232051)x1	253573010003_1	chr7(81641240-82492482)x1 chr11(79874785-82308061)x1	404011	N	GS000021336	Y	Blunt Ends	der(10) junction 4	chr10	chr2:163589063	+		KCNH7	-	chr2:188910480	-	MLT1A1-int
EGL321	F	de novo	der(2)(2pter->2q24.2::7q21.11->7qter),t(3;11)(q21;q14.1),der(7)(7pter->7q21.11::2q33.1->2qter), ins(10;2;7)(q21.3;q32.2q32.3;q21.11q22.1)	arr 7q21.11(81661185-82460701)x1,11q14.1(79992695-82232051)x1	253573010003_1	chr7(81641240-82492482)x1 chr11(79874785-82308061)x1	404011	N	GS000021336	Y	Blunt Ends	der(10) junction 5	chr10	chr2:188674479	-	L1MC3			chr2:189911145	+	Charlie2A	COL5A2	-
EGL321	F	de novo	der(2)(2pter->2q24.2::7q21.11->7qter),t(3;11)(q21;q14.1),der(7)(7pter->7q21.11::2q33.1->2qter), ins(10;2;7)(q21.3;q32.2q32.3;q21.11q22.1)	arr 7q21.11(81661185-82460701)x1,11q14.1(79992695-82232051)x1	253573010003_1	chr7(81641240-82492482)x1 chr11(79874785-82308061)x1	404011	N	GS000021336	Y	Microhomology A	der(10) junction 6	chr10	chr2:193517845	+	L1MD			chr2:163589064	+		KCNH7	-
EGL321	F	de novo	der(2)(2pter->2q24.2::7q21.11->7qter),t(3;11)(q21;q14.1),der(7)(7pter->7q21.11::2q33.1->2qter), ins(10;2;7)(q21.3;q32.2q32.3;q21.11q22.1)	arr 7q21.11(81661185-82460701)x1,11q14.1(79992695-82232051)x1	253573010003_1	chr7(81641240-82492482)x1 chr11(79874785-82308061)x1	404011	N	GS000021336	N	Inferred	der(10) junction 7	chr10	2q32.1		MLT1A1-int			2q32.3		L1MD
EGL321	F	de novo	der(2)(2pter->2q24.2::7q21.11->7qter),t(3;11)(q21;q14.1),der(7)(7pter->7q21.11::2q33.1->2qter), ins(10;2;7)(q21.3;q32.2q32.3;q21.11q22.1)	arr 7q21.11(81661185-82460701)x1,11q14.1(79992695-82232051)x1	253573010003_1	chr7(81641240-82492482)x1 chr11(79874785-82308061)x1	404011	N	GS000021336	Y	Microhomology G	der(10) junction 8	chr10	chr2:193892324	+	LTR9			chr2:188674475	-	L1MC3
EGL321	F	de novo	der(2)(2pter->2q24.2::7q21.11->7qter),t(3;11)(q21;q14.1),der(7)(7pter->7q21.11::2q33.1->2qter), ins(10;2;7)(q21.3;q32.2q32.3;q21.11q22.1)	arr 7q21.11(81661185-82460701)x1,11q14.1(79992695-82232051)x1	253573010003_1	chr7(81641240-82492482)x1 chr11(79874785-82308061)x1	404011	N	GS000021336	Y	Insertion C	der(10) junction 9	chr10	chr2:193892321	-	LTR9			chr7:82644549	-		PCLO	-
EGL321	F	de novo	der(2)(2pter->2q24.2::7q21.11->7qter),t(3;11)(q21;q14.1),der(7)(7pter->7q21.11::2q33.1->2qter), ins(10;2;7)(q21.3;q32.2q32.3;q21.11q22.1)	arr 7q21.11(81661185-82460701)x1,11q14.1(79992695-82232051)x1	253573010003_1	chr7(81641240-82492482)x1 chr11(79874785-82308061)x1	404011	Y	GS000021336	Y	Blunt Ends	der(10) junction 10	chr10	chr7:82489677	-	L1MA1	PCLO	-	chr7:98519513	+		TRRAP	+
EGL321	F	de novo	der(2)(2pter->2q24.2::7q21.11->7qter),t(3;11)(q21;q14.1),der(7)(7pter->7q21.11::2q33.1->2qter), ins(10;2;7)(q21.3;q32.2q32.3;q21.11q22.1)	arr 7q21.11(81661185-82460701)x1,11q14.1(79992695-82232051)x1	253573010003_1	chr7(81641240-82492482)x1 chr11(79874785-82308061)x1	404011	N	GS000021336	N	Inferred	der(10) junction 11	chr10	7q22.1					7q21.11
EGL321	F	de novo	der(2)(2pter->2q24.2::7q21.11->7qter),t(3;11)(q21;q14.1),der(7)(7pter->7q21.11::2q33.1->2qter), ins(10;2;7)(q21.3;q32.2q32.3;q21.11q22.1)	arr 7q21.11(81661185-82460701)x1,11q14.1(79992695-82232051)x1	253573010003_1	chr7(81641240-82492482)x1 chr11(79874785-82308061)x1	404011	N	GS000021336	Y	Microhomology GA	der(10) junction 12	chr10	chr7:82644547	+		PCLO	-	chr7:98417823	+	AluSx1
EGL321	F	de novo	der(2)(2pter->2q24.2::7q21.11->7qter),t(3;11)(q21;q14.1),der(7)(7pter->7q21.11::2q33.1->2qter), ins(10;2;7)(q21.3;q32.2q32.3;q21.11q22.1)	arr 7q21.11(81661185-82460701)x1,11q14.1(79992695-82232051)x1	253573010003_1	chr7(81641240-82492482)x1 chr11(79874785-82308061)x1	404011	N	GS000021336	Y	Blunt Ends	der(10) junction 13	chr10	chr7:87543383	+	ERV3-16A3_I-int			chr7:98519513	-		TRRAP	+
EGL321	F	de novo	der(2)(2pter->2q24.2::7q21.11->7qter),t(3;11)(q21;q14.1),der(7)(7pter->7q21.11::2q33.1->2qter), ins(10;2;7)(q21.3;q32.2q32.3;q21.11q22.1)	arr 7q21.11(81661185-82460701)x1,11q14.1(79992695-82232051)x1	253573010003_1	chr7(81641240-82492482)x1 chr11(79874785-82308061)x1	404011	N	GS000021336	Y	Microhomology CTG	der(10) junction 14	chr10	chr7:98417820	-	AluSx1			chr10:66617705	+	L1MC5
EGL321	F	de novo	der(2)(2pter->2q24.2::7q21.11->7qter),t(3;11)(q21;q14.1),der(7)(7pter->7q21.11::2q33.1->2qter), ins(10;2;7)(q21.3;q32.2q32.3;q21.11q22.1)	arr 7q21.11(81661185-82460701)x1,11q14.1(79992695-82232051)x1	253573010003_1	chr7(81641240-82492482)x1 chr11(79874785-82308061)x1	404011	Y	GS000021336	Y	Blunt Ends	der(11) chr11 inversion	chr11	chr11:79589083	-	MIRb			chr11:79873229	+
EGL321	F	de novo	der(2)(2pter->2q24.2::7q21.11->7qter),t(3;11)(q21;q14.1),der(7)(7pter->7q21.11::2q33.1->2qter), ins(10;2;7)(q21.3;q32.2q32.3;q21.11q22.1)	arr 7q21.11(81661185-82460701)x1,11q14.1(79992695-82232051)x1	253573010003_1	chr7(81641240-82492482)x1 chr11(79874785-82308061)x1	404011	N	GS000021336	Y	Insertion TGGTTCA	der(11) t(11;13)	chr11	chr11:79589077	+	MIRb			chr3:122192634	-	L1MC1	KPNA1	-
EGL356	M	unknown	der(14)t(13;13;14)(q12.3;q13.3;q11.2)	arr 13q12.3q13.3(29895591-37569485)x3,13q13.3(38199035-39032633)x3,14q11.2q12(24453274-25843700)x1	253764610002_3	chr13(29798974-37570358)x3 chr13(38136759-39044526)x3 chr14(24480274-25914483)x1	N/A	N/A	Nextera_356	Y	NGS	der(14) junction 1	chr14	chr14:24480274	+	segmental duplication	DHRS4L1	+	chr13:29897974	+
EGL356	M	unknown	der(14)t(13;13;14)(q12.3;q13.3;q11.2)	arr 13q12.3q13.3(29895591-37569485)x3,13q13.3(38199035-39032633)x3,14q11.2q12(24453274-25843700)x1	253764610002_3	chr13(29798974-37570358)x3 chr13(38136759-39044526)x3 chr14(24480274-25914483)x1	N/A	N/A	Nextera_356	N	inferred	der(14) junction 2	chr14	chr13:37570358	+	MamRep1161	ALG5	-	chr13:38136759	+		POSTN	-
EGL356	M	unknown	der(14)t(13;13;14)(q12.3;q13.3;q11.2)	arr 13q12.3q13.3(29895591-37569485)x3,13q13.3(38199035-39032633)x3,14q11.2q12(24453274-25843700)x1	253764610002_3	chr13(29798974-37570358)x3 chr13(38136759-39044526)x3 chr14(24480274-25914483)x1	N/A	N/A	Nextera_356	Y	Blunt Ends	der(14) junction 3	chr14	chr13:39044526	+				chr13:29893052	-		MTUS2	+
EGL356	M	unknown	der(14)t(13;13;14)(q12.3;q13.3;q11.2)	arr 13q12.3q13.3(29895591-37569485)x3,13q13.3(38199035-39032633)x3,14q11.2q12(24453274-25843700)x1	253764610002_3	chr13(29798974-37570358)x3 chr13(38136759-39044526)x3 chr14(24480274-25914483)x1	N/A	N/A	Nextera_356	Y	Microhomology TA	der(14) junction 4	chr14	chr13:29891922	-		MTUS2		chr14:25914306	+	MER21B
EGL826	F	maternal balanced translocation	t(1;3)(p31.3;p24.1),der(10)t(10;17)(q26.3;q25.3)	No CMA performed. 46,XX,t(1;3)(p22.3;p21.31).ish t(1;3)(pter-,pter+;pter-,pter+),der(10)t(10;17)(qter-;qter+) by karyotype and subtelomere FISH.	256358410001_4	chr10(134039254-135534746)x1 chr17(76771423-81195209)x3	N/A	N/A	GS000021340	Y	Microhomology GC	der(1)t(1;3)	chr1	chr3:30770840	+		GADL1	-	chr1:68440602	+	MLT1A0	GNG12-AS1	+
EGL826	F	maternal balanced translocation	t(1;3)(p31.3;p24.1),der(10)t(10;17)(q26.3;q25.3)	No CMA performed. 46,XX,t(1;3)(p22.3;p21.31).ish t(1;3)(pter-,pter+;pter-,pter+),der(10)t(10;17)(qter-;qter+) by karyotype and subtelomere FISH.	256358410001_4	chr10(134039254-135534746)x1 chr17(76771423-81195209)x3	N/A	N/A	GS000021340	Y	Microhomology C	der(3)t(1;3)	chr3	chr1:68440600	+	MLT1A0	GNG12-AS1	+	chr3:30770840	+		GADL1	-
EGL826	F	de novo	t(1;3)(p31.3;p24.1),der(10)t(10;17)(q26.3;q25.3)	No CMA performed. 46,XX,t(1;3)(p22.3;p21.31).ish t(1;3)(pter-,pter+;pter-,pter+),der(10)t(10;17)(qter-;qter+) by karyotype and subtelomere FISH.	256358410001_4	chr10(134039254-135534746)x1 chr17(76771423-81195209)x3	N/A	N/A	GS000021340	Y	Microhomology CTG	der(10)t(10;17)	chr10	chr10:134039123	+		STK32C	-	chr17:77021722	-		C1QTNF1	+
EGL826	F	de novo	t(1;3)(p31.3;p24.1),der(10)t(10;17)(q26.3;q25.3)	No CMA performed. 46,XX,t(1;3)(p22.3;p21.31).ish t(1;3)(pter-,pter+;pter-,pter+),der(10)t(10;17)(qter-;qter+) by karyotype and subtelomere FISH.	256358410001_4	chr10(134039254-135534746)x1 chr17(76771423-81195209)x3	N/A	N/A	GS000021340	Y	Microhomology C	der(10) chr17 inversion	chr10	chr17:76771288	-		CYTH1	-	chr17:76809161	+		USP36	-
