# Supplementary material for: Unbalanced translocations arise from diverse mutational mechanisms including chromothripsis
Source: HighWire-hosted journal article supplement (doi:10.1101/gr.191247.115), 2015-06-12
Supplement: TableS3.xlsx [file TableS3.xlsx]

## Sheet: S3
Subject	SNP	Coordinate	Chromothripsis allele	Maternal genotype	Paternal genotype	Conclusion
EGL302	rs4604474	chr8:112381404	A	AT	AA	derived from paternal allele
EGL302	rs7866922	chr9:8719260	A	AG	AA	derived from paternal allele
EGL302	rs906636	chr9:8719321	A	AG	AA	derived from paternal allele
EGL302	rs72700399	chr9:8719385	C	CG	CC	derived from paternal allele
EGL302	rs66523670	chr9:8719493	A	AG	AA	derived from paternal allele
EGL302	rs72700400	chr9:8719524	G	GA	GG	derived from paternal allele
EGL302	rs10815870	chr9:8430111	C	AA	CA	derived from paternal allele
EGL321	rs59684283	chr7:81641187	C	TT	CT	derived from paternal allele
EGL321	rs4115404	chr10:66617809	T	GG	TT	derived from paternal allele
EGL321	rs2357461	chr2:193769528	G	AG	GG	derived from paternal allele
EGL321	rs10761871	chr10:66616535	G	CC	GG	derived from paternal allele
EGL321	rs2709905	chr7:82941571	G	AG	GG	derived from paternal allele
EGL321	rs2709904	chr7:82941789	A	GG	AA	derived from paternal allele
